# Supplementary material
Source: PubMed Central journal article supplement (PMC8502469)
Supplement: cvaa265_supplementary_data.pdf [file cvaa265_supplementary_data.pdf]

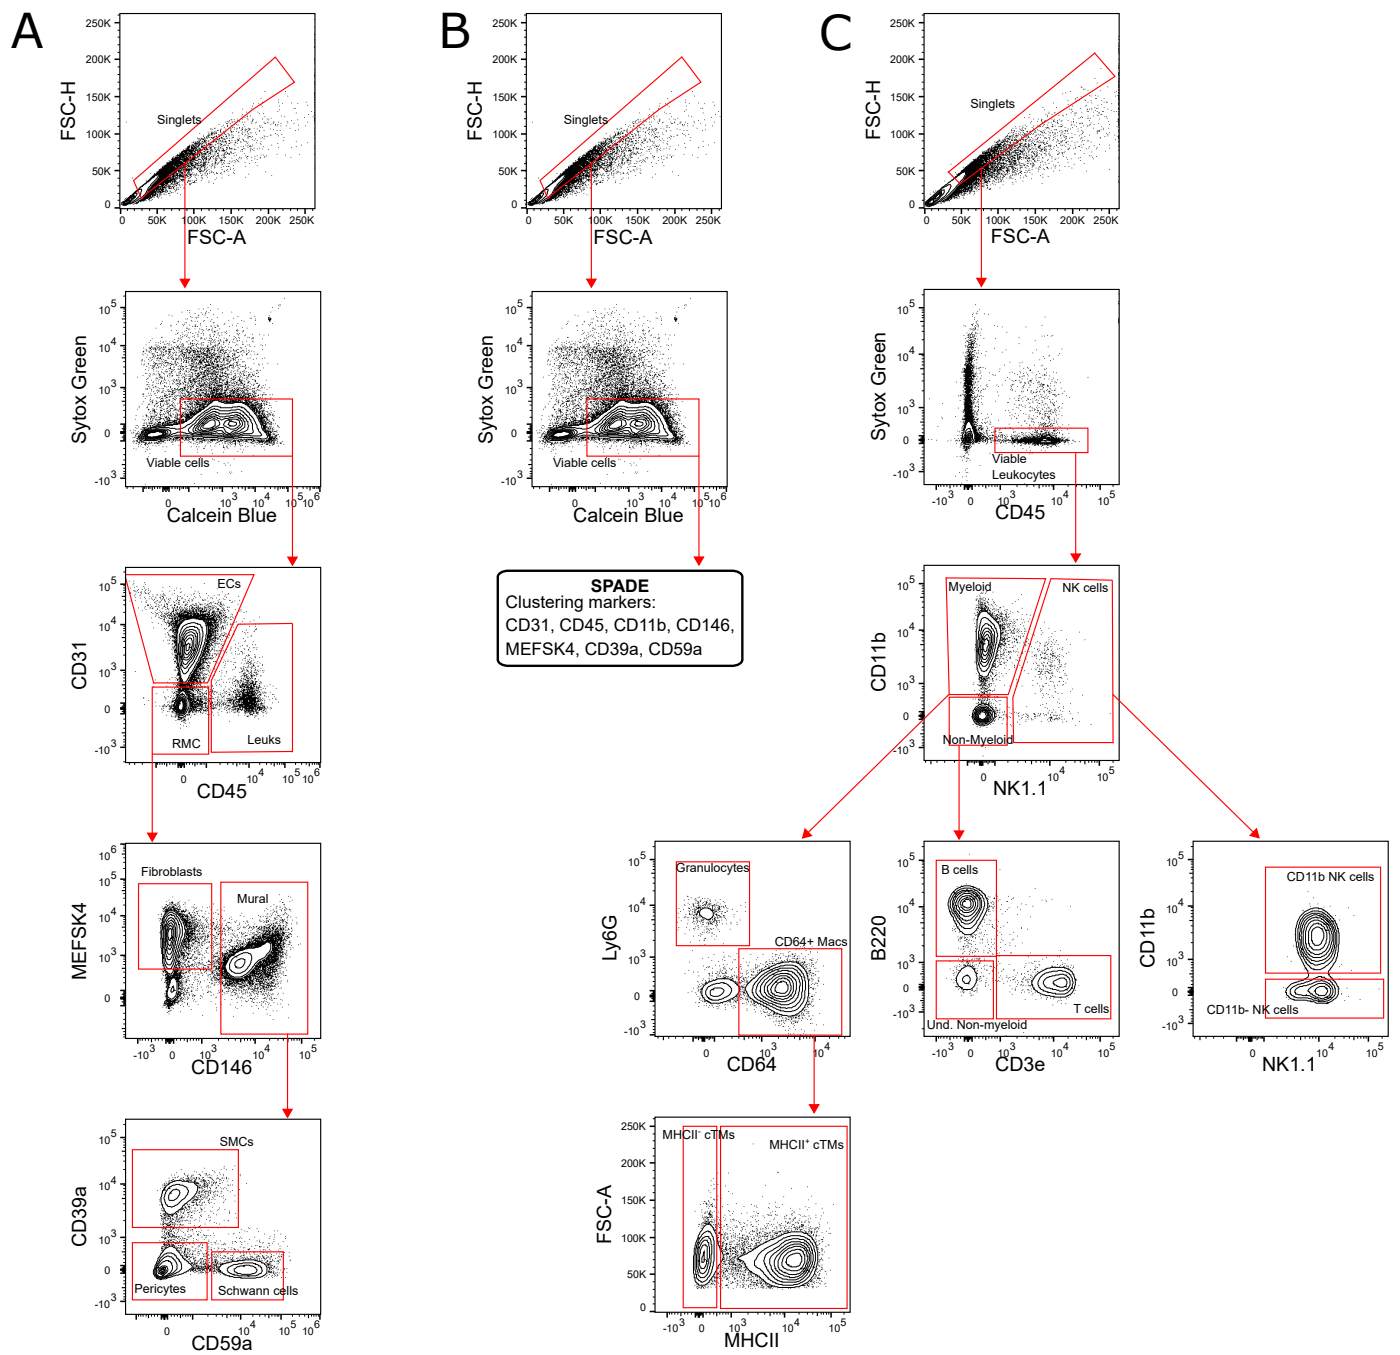

**Online Figure 1. Gating strategies for flow cytometry experiments in Figures 1.**

(A) Gating strategy used for analysis shown in Figure 1A-B and F. (B) Gating strategy and markers used for SPADE dendrogram shown in Figure 1E. Note: single and viable cell (Sytox Green<sup>low</sup>-, Calcein blue<sup>+</sup>) is identical to shown in Online Figure 1A. (C) Gating strategy for analysis shown in Figure 1F-G.

FSC-H: forward scatter height; FSC-A: forward scatter area; SPADE: spanning-tree progression analysis of density-normalized events.

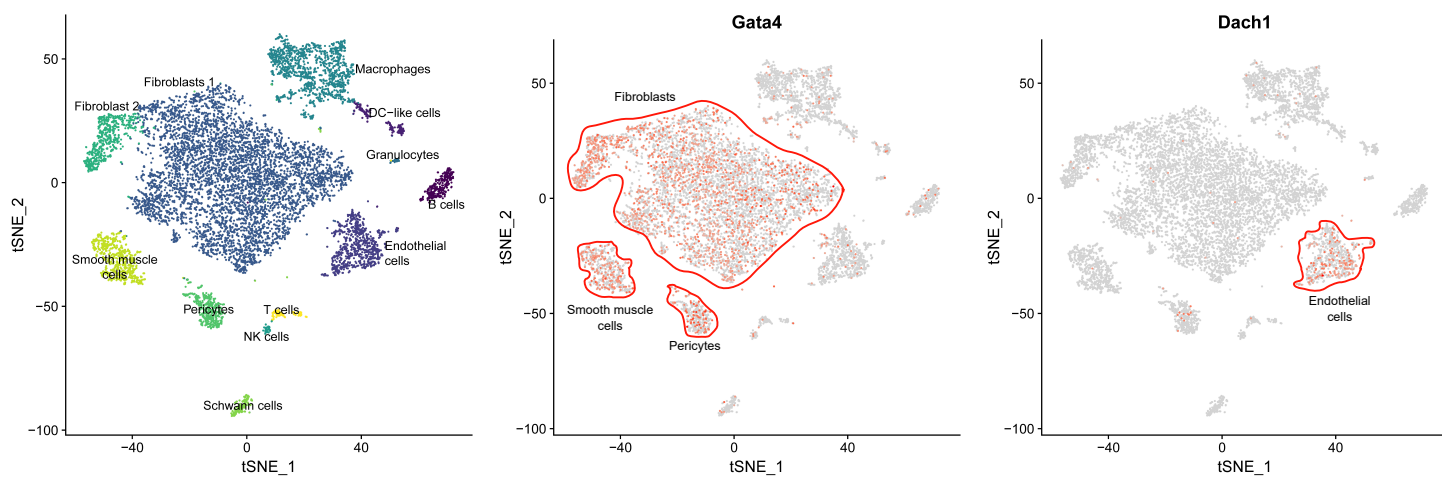

**Online Figure 2. tSNE plot displaying Gata4 and Dach1 transcript levels in mouse cardiac non-myocytes.**

(A) Left panel shows tSNE projection with non-myocyte cell populations labelled. Middle and right panel shows tSNE projections with Gata4 and Dach1 transcript levels heat mapped (red= high, grey=low). Data from a previously published dataset5.

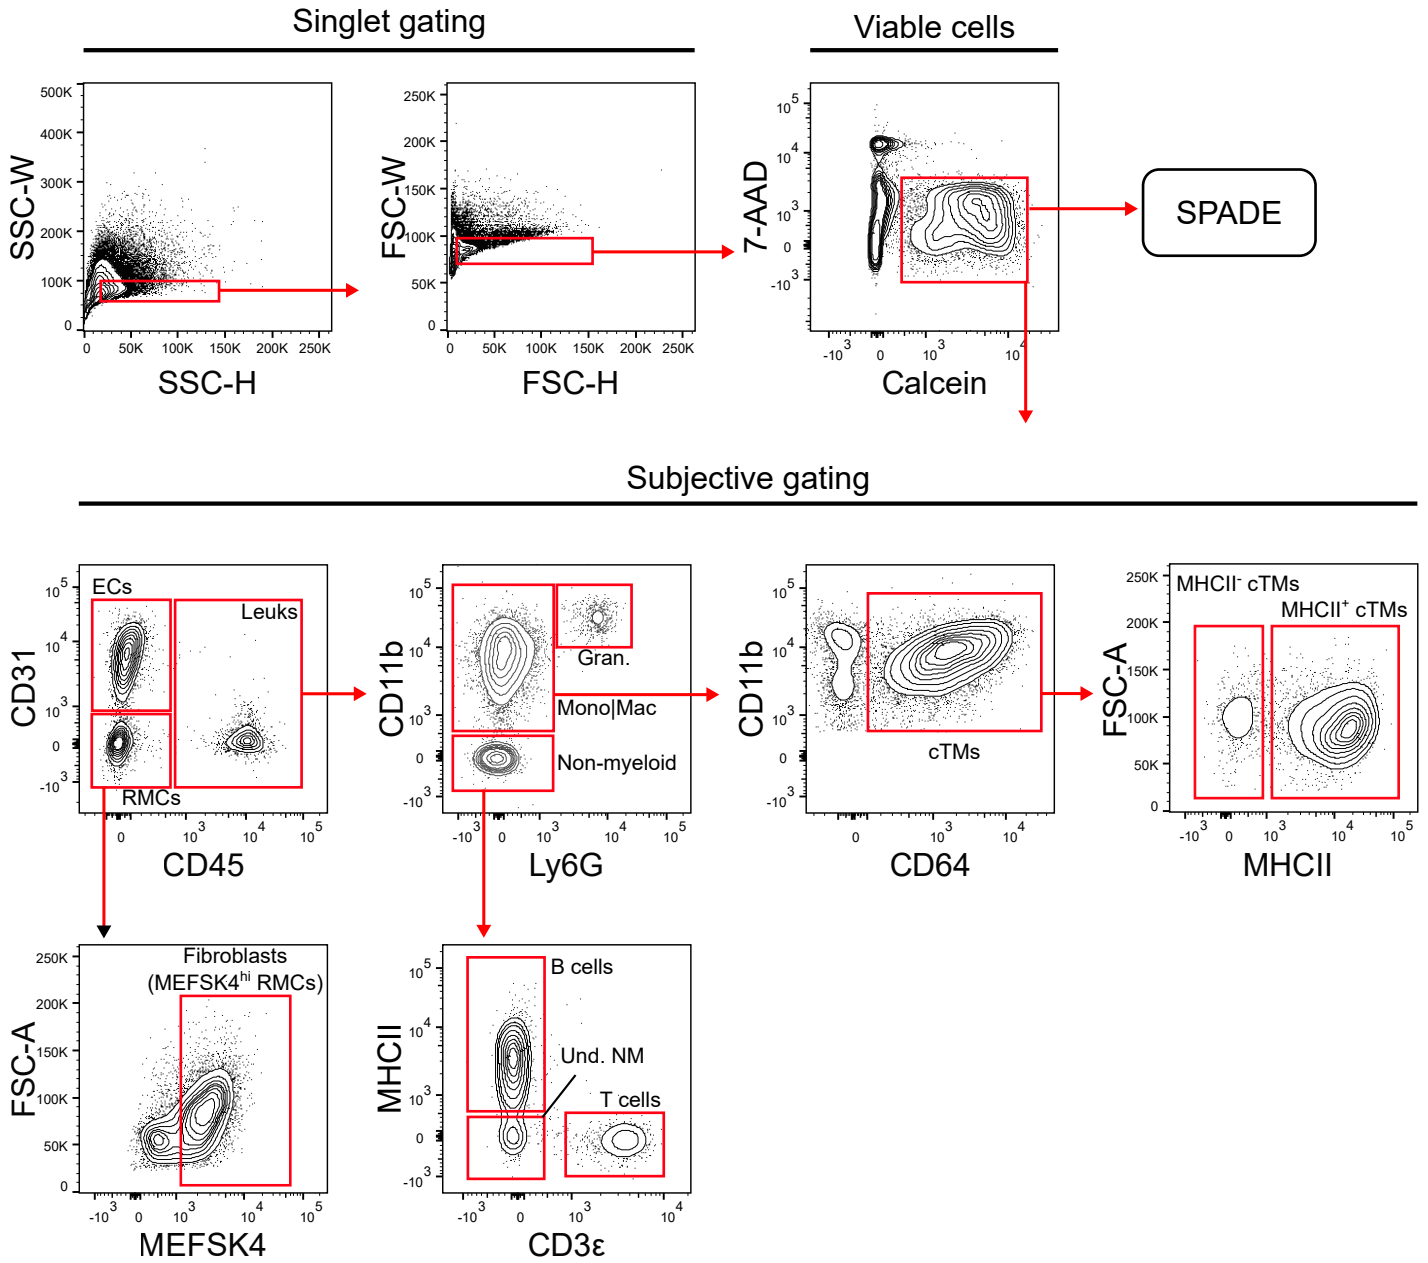

**Online Figure 3. Gating strategies for cardiac cell populations and SPADE analysis in Figures 2-4.**

7-AAD: 7-aminoactinomycin D; SSC-W: side scatter width; SSC-H: side scatter height; FSC-W: forward scatter width; FSC-H: forward scatter height; FSC-A: forward scatter area; SPADE: spanning-tree progression analysis of density-normalized events.

**Online Table 1.** Antibodies used.

| <b>Antibody/reagent</b> | <b>Clone</b> | <b>Concentration<br/>(<math>\mu\text{g/ml}</math>)</b> | <b>Supplier</b> |
|-------------------------|--------------|--------------------------------------------------------|-----------------|
| anti-CD146              | ME-9F1       | 1.0                                                    | Biolegend       |
| anti-CD31               | 390          | 0.5                                                    | Biolegend       |
| anti-CD11b              | M1/70        | 0.5                                                    | Biolegend       |
| anti-CD45               | 30-F11       | 1.0                                                    | Biolegend       |
| anti-Ly6G               | 1A8          | 0.5                                                    | Biolegend       |
| anti-MEFSK4             | MEFSK4       | 1.5                                                    | Miltenyi Biotec |
| anti-CD39a              | Duha59       | 1.0                                                    | Biolegend       |
| anti-CD59a              | mCD59.3      | 1.0                                                    | Biolegend       |
| anti-NK1.1              | PK136        | 1.0                                                    | Biolegend       |
| anti-Ly6G               | 1A8          | 1.0                                                    | Biolegend       |
| anti-CD64               | X54-5/7.1    | 0.5                                                    | Biolegend       |
| anti-CD3 $\epsilon$     | 145-2C11     | 0.25                                                   | Biolegend       |
| anti-B220               | RA3-6B2      | 1.25                                                   | Biolegend       |
| anti-I-A/I-E            | M5/114.15.2  | 0.25                                                   | Biolegend       |
| anti-CD16/CD32          | 93           | 4.0                                                    | Biolegend       |
| Anti-Dach1              | Polyclonal   | 0.83                                                   | Proteintech     |
| Anti-PCM1               | Polyclonal   | 5.3                                                    | Proteintech     |
| Anti-Gata4              | 532020       | 0.7                                                    | R&D Systems     |
